# Supplementary material for: Holocene climate aridification trend and human impact interrupted by millennial- and centennial-scale climate fluctuations from a new sedimentary record from Padul (Sierra Nevada, southern Iberian Peninsula)
Source: Copernicus journal article supplement (doi:10.5194/cp-14-117-2018), 2018-01-26
Supplement: Supplementary file 1 [file cp-14-117-2018-supplement.pdf]

Supplement of *Clim. Past*, 14, 117–137, 2018  
<https://doi.org/10.5194/cp-14-117-2018-supplement>  
© Author(s) 2018. This work is distributed under  
the Creative Commons Attribution 4.0 License.

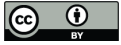

*Supplement of*

**Holocene climate aridification trend and human impact interrupted by millennial- and centennial-scale climate fluctuations from a new sedimentary record from Padul (Sierra Nevada, southern Iberian Peninsula)**

**María J. Ramos-Román et al.**

*Correspondence to:* María J. Ramos-Román (mjrr@ugr.es)

The copyright of individual parts of the supplement might differ from the CC BY 4.0 License.

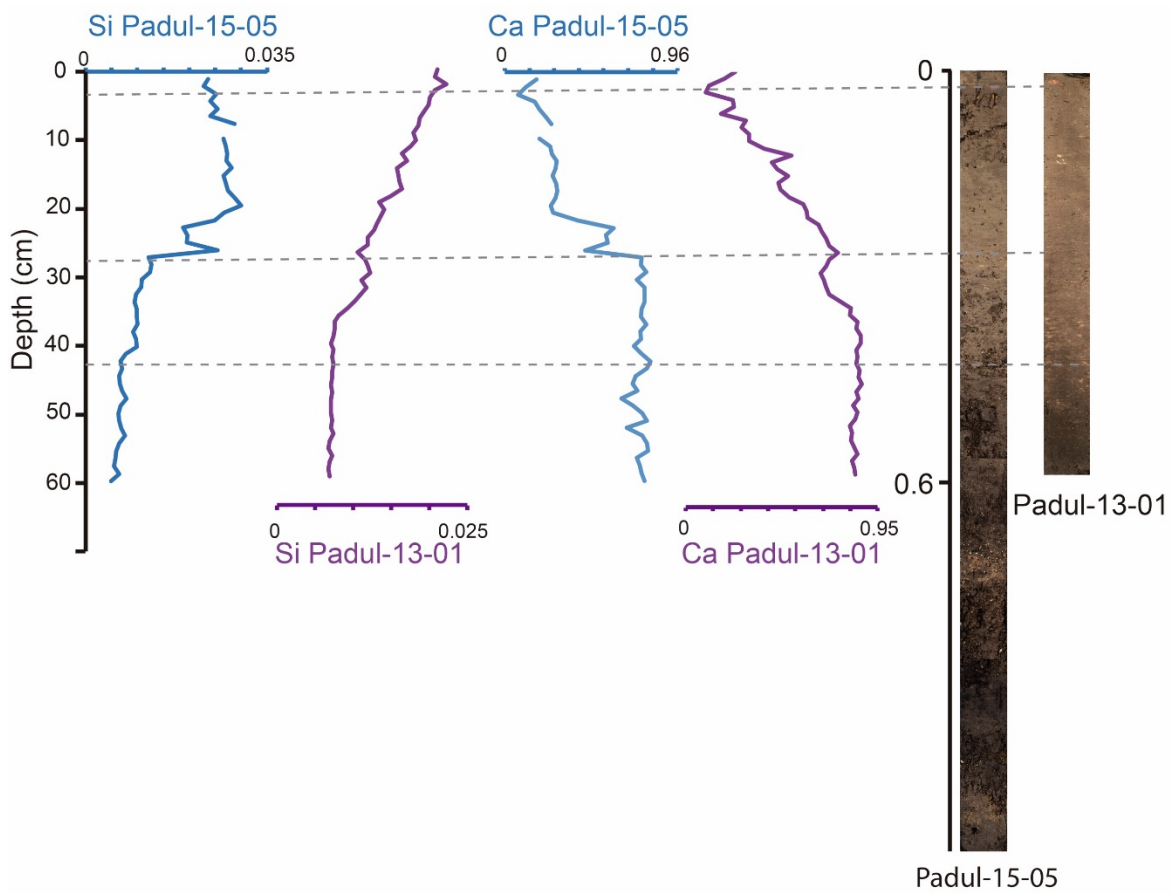

**Figure S1:** Lithological and geochemical comparison between the upper part of the Padul-15-05 and the Padul-13-01 records.
